# Supplementary material for: High-throughput identification of reference genes for research and clinical RT-qPCR analysis of breast cancer samples
Source: Springer Nature journal article supplement (doi:10.1186/2043-9113-3-13), 2013-01-01

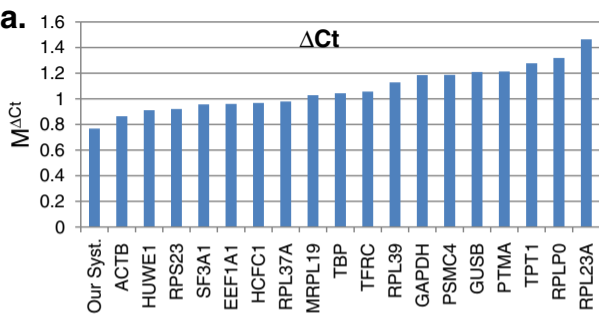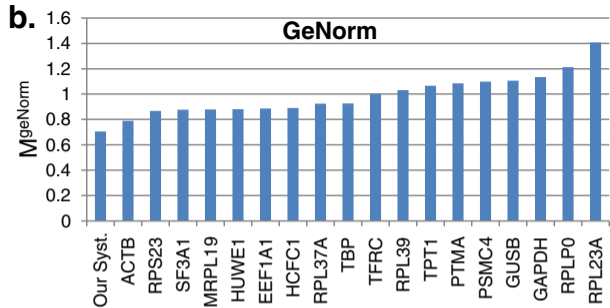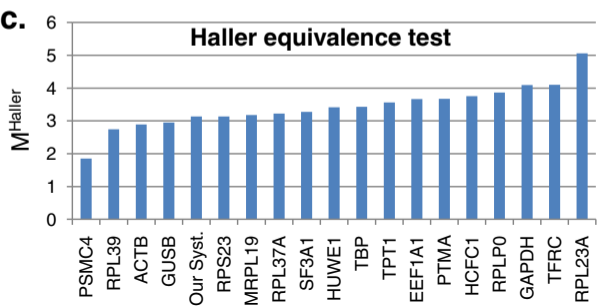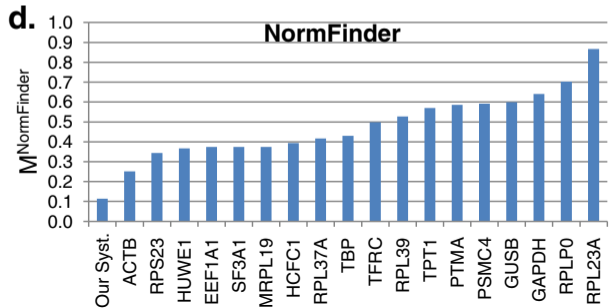

Supplement: 13336_2013_74_MOESM8_ESM.pdf [file 13336_2013_74_MOESM8_ESM.pdf]
